# Supplementary material for: Potential of Mycobacterium tuberculosis chorismate mutase (Rv1885c) as a novel TLR4-mediated adjuvant for dendritic cell-based cancer immunotherapy
Source: PubMed Central journal article supplement — Oncoimmunology. 2022 Jan 20;11(1):2023340. doi: 10.1080/2162402X.2021.2023340 (PMC8786331; doi:10.1080/2162402x.2021.2023340), 2022-01-20
Supplement: KONI_A_2023340_SM3532.pdf [file KONI_A_2023340_SM3532.pdf]

1 Supplementary Materials for

2 **Potential of *Mycobacterium tuberculosis* chorismate mutase (Rv1885c) as a novel**

3 **TLR4-mediated adjuvant for dendritic cell-based cancer immunotherapy**

4

5 Hyein Jeong<sup>1,2,3,4,5,6</sup>, So-Young Lee<sup>1,3,4,5,6</sup>, Hyejun Seo<sup>1,3,4,5,6</sup>, Dong Hyun Kim<sup>1,2,3,4,5,6</sup>, Duhyung

6 Lee<sup>1,3,4,5</sup> and Bum-Joon Kim<sup>1,2,3,4,5,6\*</sup>

7 <sup>1</sup> Department of Microbiology and Immunology, College of Medicine, Seoul National University, Seoul, South  
8 Korea

9 <sup>2</sup> Department of Biomedical Sciences, College of Medicine, Seoul National University, Seoul, South Korea

10 <sup>3</sup> Liver Research Institute, College of Medicine, Seoul National University, Seoul, South Korea

11 <sup>4</sup> Cancer Research Institute, College of Medicine, Seoul National University, Seoul, South Korea

12 <sup>5</sup> Institute of Endemic Diseases, Seoul National University Medical Research Center (SNUMRC), Seoul, South  
13 Korea

14 <sup>6</sup> BK21 FOUR Biomedical Science Project, Seoul National University College of Medicine, Seoul, South Korea

15

16 \*Author for correspondence: Bum-Joon Kim, Ph.D.

17 **E-mail: kbumjoon@snu.ac.kr**

18 **Tel: +82 2 740 8315**

19 **Fax: +82 2 743 0881**

20

## 21 **Materials and Methods**

### 22 **Expression and purification of recombinant TBCM protein**

23 The recombinant TBCM protein was purified from *Escherichia coli* as previously described (32).  
24 Briefly, *E. coli* BL21 strains (RBC Bioscience, Taipei City, Taiwan) were transformed with pET28a-  
25 TBCM for expression and purification. Each protein was purified with Ni-NTA His binding resin  
26 (Merck, Darmstadt, Germany) and eluted with elution buffer (300 mM NaCl, 50 mM sodium  
27 phosphate buffer, and 250 mM imidazole) containing 4 M urea. Purified proteins were dialyzed  
28 serially against elution buffer to remove imidazole, urea, and residual salts.

29

### 30 **Cell culture**

31 For preparation of murine bone marrow-derived dendritic cells (BMDCs), whole bone marrow cells  
32 isolated from the tibia and femurs of C57BL/6 mice were lysed with red blood cell lysis buffer and  
33 washed with RPMI 1640 medium (Life Technologies, CA, USA). Then, the cells were cultured in  
34 IMDM supplemented with 100 units/ml penicillin/streptomycin, 10% fetal bovine serum (FBS), 20  
35 ng/ml GM-CSF and 10 ng/ml IL-4. On Day 6, over 80% of the nonadherent cells expressed CD11c.  
36 On Day 6 or 7 of culturing, nonadherent cells and loosely adherent proliferating DC aggregates were  
37 harvested for analysis. Human DCs were differentiated after the isolation of CD14<sup>+</sup> monocytes from  
38 peripheral blood mononuclear cells (PBMCs) isolated from healthy donors according to the approved  
39 protocol from the Institutional Review Board (IRB) of Seoul National University (IRB-2109-114-  
40 1255). Cells were isolated and cultured in RPMI 1640 supplemented with 100 units/ml  
41 penicillin/streptomycin, 10% FBS, 50 ng/ml human GM-CSF and 20 ng/ml human IL-4. Culture  
42 medium was changed every two days and the cells were differentiated for five days.

43 Human monocytic THP-1 cells were cultured in RPMI 1640 (Life Technologies, CA, USA)  
44 supplemented with 100 units/ml penicillin/streptomycin and 10% FBS and differentiated by treatment  
45 with PMA (200 µg/ml) for 24 h (33). Lewis lung carcinoma (LLC) cells and B16F10 murine

46 melanoma cells were cultured in RPMI medium supplemented with 100 units/ml  
47 penicillin/streptomycin and 10% FBS. Splenocytes isolated from tumor-bearing mice were incubated  
48 in RPMI medium (Life Technologies, CA, USA) supplemented with 100 units/ml  
49 penicillin/streptomycin, 10% FBS and IL-2 for 6 days. EO771 murine breast cancer cells and A549  
50 human lung cancer cells were cultured in DMEM (Life Technologies, CA, USA) supplemented with  
51 100 units/ml penicillin/streptomycin and 10% FBS.

52

### 53 **Flow cytometry**

54 To assess BMDC maturation, BMDCs were stained with monoclonal antibodies against CD11c,  
55 CD40, CD80, CD86, MHCII, MHCI, or CCR7 (CD197) for 30 min on ice. To assess CD8<sup>+</sup> T cell and  
56 memory T cell generation *in vivo*, mouse tumor tissues and lymph nodes were dissociated with  
57 collagenase IV (0.5 mg/ml, Sigma, USA) and DNase I (20 µg/ml, Sigma, USA). Single tumor cells,  
58 lymph nodes and splenocytes were mashed through a 70 µm-pore size cell strainer and stained with  
59 mAbs against CD3, CD4, CD8, CD44, CD62L or CD11c for 30 min on ice. For intracellular cytokine  
60 staining, cells were cultured for 4 h with PMA (50 ng/ml) and ionomycin (1 µg/ml), and cytokine  
61 release was prevented by treatment with brefeldin A. Following fixation/permeabilization, cells were  
62 stained with mAbs against IFN-γ, IL-2, IL-4, IL-17A, T-bet, GATA-3, RORγt or IL-12. All  
63 antibodies were purchased from BD Biosciences (USA). Fluorescence was measured using FACS  
64 Fortessa (BD Biosciences, USA) and FlowJo software (BD Biosciences, USA).

65

### 66 **Cell apoptosis assay**

67 Lymphocytes from mouse tumor and lung tissue were isolated by Ficoll-Paque density gradient  
68 centrifugation (34), and tumor-infiltrating lymphocytes (TILs), lung lymphocytes and lymph node  
69 cells were cocultured with CFSE-labeled LLC cancer cells (E:T=5:1) for 24 h at 37°C in 5% CO<sub>2</sub>.  
70 Then, the cells were stained with 5 µl 7AAD and 2.5 µl Annexin V-PE for 10 min on ice according to

71 the manufacturer's guidelines for apoptosis detection kits (BD Biosciences, USA). Flow cytometry  
72 was performed by a FACS Fortessa (BD Biosciences, USA). The data were analyzed by FlowJo  
73 software (BD Biosciences, USA).

74 For *in vitro* antigen-specific T cell cytotoxicity assay, human DCs were incubated with A549 lysates  
75 (tumor-associated antigens; TAAs) at a ratio of 3:1 tumor cell equivalents in the presence or absence  
76 of TBCM (1 µg/ml) or lipopolysaccharide (0.1 µg/ml) for 24 h. Human CD4<sup>+</sup> and CD8<sup>+</sup> T cells were  
77 isolated from PBMCs of healthy donors and CD8<sup>+</sup> T cells were cocultured with TAAs-, TBCM- or  
78 LPS-treated human DCs in the presence or absence of CD4<sup>+</sup> T cells (T cell:DC=10:1) for five days.  
79 Thereafter, cells were cocultured with CFSE-labelled A549 cancer cells (E:T=5:1) for 48 h at 37°C in  
80 5% CO<sub>2</sub>. The cells were stained with 7AAD and Annexin V according to the manufacturer's  
81 guidelines in Apoptosis detection kit (BD Biosciences, USA) and analyzed by FACs LSRII (BD  
82 Biosciences, USA) and FlowJo software (BD Biosciences, USA).

83

#### 84 **Antigen uptake assay**

85 BMDCs were equilibrated at 37°C or 4°C for 30 min and incubated with 50 µg/ml fluorescein  
86 isothiocyanate (FITC)-conjugated dextran (60842-46-8, Sigma, USA). Cold staining buffer was added  
87 to stop the reaction, and the cells were washed three times, stained with mAb against CD11c, and  
88 analyzed using a FACS Fortessa (BD Biosciences, USA). The data were analyzed by FlowJo software  
89 (BD Biosciences, USA). Nonspecific binding or uptake of FITC-dextran to BMDCs was detected by  
90 incubating BMDCs with FITC-dextran at 4°C, and the resulting background value was subtracted  
91 from the specific binding values.

92

#### 93 **Blocking antibody assay**

94 BMDCs were stimulated with TBCM (1 µg/ml), TLR2 agonist Pam<sub>3</sub>CSK<sub>4</sub> (0.1 µg/ml; Sigma, USA)  
95 or TLR4 agonist lipopolysaccharide (0.1 µg/ml; *Escherichia coli* serotype 0111:B4, Sigma, USA) for  
96 24 h. For the blocking antibody assay, BMDCs were preincubated with 1 µg/ml anti-TLR2 or anti-

97 TLR4 for 1 h, followed by stimulation with TBCM or TLR agonists.

98

#### 99 ***In vitro* and *in vivo* migration test**

100 Cell migration was detected using 8 µm-pore size Transwell coated with Matrigel (Corning, USA).

101 BMDCs were resuspended in media containing TBCM or LPS, and the cell density was adjusted to

102  $1 \times 10^5$  cells/200 µl media in the upper well of the Transwell chamber. The lower compartment was

103 filled with 500 µl media in the presence or absence of 500 ng/ml CCL19 chemoattractant. After 48 h

104 of incubation, the cells in the upper well were wiped using a wet cotton swab, and traversed cells on

105 the lower side of the filter were fixed and stained with crystal violet.

106 For the *in vivo* migration test, TBCM- or LPS-treated BMDCs were labeled with 1 µM CFSE, and

107 CFSE-DCs ( $1 \times 10^6$  cells/50 µl PBS) were injected into the hind-leg footpad of C57BL/6 mice. 72 h

108 after the injection, inguinal lymph nodes were removed and disaggregated using collagenase I (0.5

109 mg/ml, Sigma, USA) and DNase I (20 µg/ml, Sigma, USA). CFSE-positive DCs were measured using

110 FACS Fortessa (BD Biosciences, USA) and FlowJo software (BD Biosciences, USA). In the same

111 mouse experiment, one week after DC injection, CD4<sup>+</sup> and CD8<sup>+</sup> T cells sorted from inguinal lymph

112 nodes were analyzed by RT-qPCR.

113

#### 114 **Immunofluorescence staining**

115 BMDCs were plated on poly-L-lysine-coated glass coverslips. After treatment with TBCM or TLR

116 agonists, cells were fixed in 4% paraformaldehyde, permeabilized in 0.1% Triton X-100 in PBS, and

117 then blocked with 2% bovine albumin serum (BSA) in PBS for 1 h. Thereafter, cells were incubated

118 with mouse anti-NF-κB/p65 polyclonal antibody at 4°C overnight. After washing with PBS, cells

119 were incubated with FITC-conjugated secondary antibody in a dark room for 1 h and stained with

120 DAPI for 5 min at room temperature. Fluorescence intensity was observed using an FV3000 confocal

121 laser scanning microscope.

122 For the histological analysis, the fixed tumor tissues were embedded in paraffin and sectioned. After

123 deparaffination and rehydration, each section was permeabilized in 0.5% Triton X-100 in TBST and

124 blocked in 5% BSA in TBST. Then, the section slides were incubated with primary antibodies against  
125 CD8, CXCR3, Perforin-1 and Granzyme (all antibodies purchased from Santa Cruz) at 4°C overnight,  
126 followed by incubation with fluorescent dye-conjugated secondary antibodies in a dark room for 2 h.  
127 After staining with DAPI, fluorescence intensity was observed using an FV3000 confocal laser  
128 scanning microscope.

129

### 130 **Western blot assay**

131 BMDCs and tumor tissues were lysed in radioimmunoprecipitation assay (RIPA, Thermo Fisher  
132 Scientific, USA) buffer containing phosphatase inhibitor and protease inhibitor cocktail and  
133 homogenized. The protein samples were quantified by Bradford assay, boiled for 5 min at 95°C,  
134 separated on a 10% SDS-polyacrylamide gel, and transferred onto a nitrocellulose membrane.  
135 Thereafter, the membranes were blocked in 5% BSA in TBST for 1 h at room temperature and  
136 incubated with primary antibodies (all purchased from Cell Signaling Tech, USA) at 4°C overnight,  
137 followed by incubation with HRP-conjugated secondary antibodies for 1 h at room temperature. The  
138 protein blots were detected using enhanced chemiluminescence (ECL) reagents (Bio-Rad, USA).

139

### 140 **T cell proliferation and polarization assay**

141 CD4<sup>+</sup> and CD8<sup>+</sup> T cells were isolated from the spleen of C57BL/6 mice by FACS Aria III (BD  
142 Biosciences, USA), and T cells were stained with 1 μM CFSE. CFSE-labeled CD4<sup>+</sup> T cells were  
143 cocultured with BMDCs (T cell:DC=10:1) that had been incubated with tumor-associated antigens in  
144 the presence or absence of TBCM or LPS. After 24 h incubation, culture supernatants were harvested,  
145 and cytokine levels were measured by ELISA (Invitrogen, USA) according to the manufacturer's  
146 procedure. For the T cell polarization assay, 96 h after coculture incubation, CFSE-labeled T cells  
147 were assessed by flow cytometry. For the T cell polarization assay, 72 h after coculture incubation,  
148 intracellular cytokine production and transcription factor expression in T cells were analyzed by  
149 intracellular cytokine staining. In the same manner, human DCs were incubated with A549 lysates  
150 (tumor-associated antigens; TAAs) at a ratio of 3:1 tumor cell equivalents in the presence or absence

151 of TBCM (1 µg/ml) or lipopolysaccharide (0.1 µg/ml) for 24 h. Human CD4<sup>+</sup> T cells were isolated  
152 from PBMCs of healthy donors and cocultured with TAAs-, TBCM- or LPS-treated human DCs (T  
153 cell:DC=10:1) for 72 h. Thereafter, intracellular cytokine production and transcription factors  
154 expression in T cells were analyzed by intracellular cytokine staining.

155

#### 156 **RNA extraction and RT-qPCR**

157 Total mRNA was extracted from DCs and tumor tissues using TRIzol reagent (Invitrogen, USA),  
158 quantified, and transcribed into complementary DNA by reverse transcriptase. The transcription level  
159 of target genes was detected using a CFX Connect real-time system (Bio-Rad, USA) and analyzed by  
160 RT-qPCR with sets of primers (**Supplementary Table S1**). The housekeeping gene GAPDH was  
161 used as an internal control. The fold change was calculated using the delta-delta CT method (**35**) and  
162 normalized by the average delta CT value of the PBS group or all groups.

163

#### 164 **LPS decontamination test**

165 To confirm that BMDC maturation induced by TBCM was not due to contaminating endotoxins such  
166 as LPS, pretreatment with polymyxin B (Sigma, USA), heat denaturation, and digestion with  
167 proteinase K (Sigma, USA) were conducted. BMDCs were preincubated with 10 µg/ml polymyxin for  
168 20 min at room temperature prior to treatment with TBCM or LPS. For heat denaturation, TBCM and  
169 LPS were boiled at 100°C for 30 min. For digestion with proteinase K, TBCM and LPS were  
170 incubated with 10 µg/ml proteinase K at 37°C for 1 h, followed by enzyme denaturation at 100°C for  
171 15 min, and then added to BMDC cultures. After 24 h incubation, cytokine levels in BMDC culture  
172 supernatants were detected by ELISA (Invitrogen, USA) according to the manufacturer's procedure.

173

#### 174 **Statistical analysis**

175 Data are shown as the mean±SD and were analyzed using GraphPad Prism 9 statistical software  
176 (GraphPad, CA, USA). Significant differences among multiple groups were analyzed by one-way  
177 analysis of variance (ANOVA) followed by Dunnett's multiple comparison test. A *p* value of < 0.05

178 was considered to denote statistical significance.  $*p < 0.05$ ,  $**p < 0.01$ , and  $***p < 0.001$ .

179



180 **Supplementary Table S1. Primer sets used for RT-qPCR**

| Target gene    | foward (5'→3')            | reverse (5'→3')                |
|----------------|---------------------------|--------------------------------|
| CXCL9          | GCCATGAAGTCCGCTGTTCT      | GGGTTCTCGAACTCCACACT           |
| CXCL10         | GACGGTCCGCTGCAACTG        | GCTTCCCTATGGCCCTCATT           |
| CXCR3          | GAGGTTAGTGAACGTCAAGTG     | GGGGTCCCTGCGGTAGATCTG          |
| IFN $\gamma$   | TGGCATAGATGTGGAAGAAAAGAG  | TGCAGGATTTTCATGTCCACAT         |
| Gzmb           | ATGCTGCTAAAGCTGAAGAGT     | TTCCCAACCAGCCACATAG            |
| Prf            | TTGGTGGGACTTCAGCTTTCC     | CCATACACCTGGCACGAACT           |
| FasL           | CTAGAGGGCCGGACCAAAGGAGACC | AGGTGGAAGAGCTGATACATTCCTAATCCC |
| Trail          | ATGGTGATTTGCATAGTGCTCC    | GCAAGCAGGGTCTGTTCAAGA          |
| IL-12          | GGAAGCACGGCAGCAGAAT       | GGCGGGTCTGGTTTGATG             |
| E-Cadherin     | AATGGCGGCAATGCAATCCAAGA   | TGCCACAGACCGATTGTGGAGATA       |
| N-Cadherin     | TGGAGAACCCATTGACATT       | TGATCCCTCAGGAAGTGTCC           |
| TSP-1          | GCAGCACACACAGAAGCATT      | CAATCAGCTCTACCAGCAG            |
| Fibronectin1   | TAGCAGGCTACCGACTGACCG     | CACCCAGCTTGAAGCCAATCC          |
| Snail1         | CCACTGCAACCGTGCTTTT       | CACATCCGAGTGGGTTTGG            |
| Vimentin       | TTCTCTGGCAGCTCTTGACC      | CTCCTGGAGGTTCTTGGCAG           |
| ZEB1           | ACAAGACACCGCCGTCATTT      | GCAGGTGAGCAACTGGGAAA           |
| p38 MAPK       | GACGAATGGAAGAGCCTGAC      | AGATACATGGACAAACGGACA          |
| Slug           | CATTGCCTTGTGTCTGCA        | AGAAAGGCTTTTCCCAGTG            |
| ERK1           | GCTCGACCACACTGGCTTTC      | GATCAACTCCTTCAGCCGCTC          |
| Cyclin D1      | GCGTACCCTGACACCAATCTC     | CTCCTCTTCGACTTCTGCTC           |
| Cyclin D2      | GAGTGGGAACTGGTAGTGTTG     | CGCACAGAGCGATGAAGGT            |
| Bcl2           | TGAGTACCTGAACCGGCATCT     | GCATCCCAGCCTCCGTTAT            |
| BAX            | TGAAGACAGGGGCCTTTTTG      | AATTCGCCGGAGACTCG              |
| BAD            | GCCCTAGGCTTGAGGAAGTC      | CAAACCTGGGATCTGGAACA           |
| p53            | CACGTA CTCTCCTCCCCTCAAT   | AACTGCACAGGGCACGTCTT           |
| Rac1           | GAGACGGAGCTGTTGGTAAAA     | ATAGGCCAGATTCACTGGTT           |
| HIF-1 $\alpha$ | GAAATGGCCAGTGAGAAAA       | CTTCCACGTTGCTGACTTGA           |
| IL-8           | ATGGCTGCTCAAGGCTGGTC      | AGGCTTTTCATGCTCAACACTAT        |

|        |                         |                         |
|--------|-------------------------|-------------------------|
| MMP-2  | GAGTTGGCAGTGCAATACCT    | GCCGTCCTTCTCAAAGTTGT    |
| MMP-9  | AGTTTGGTGTGCGGGAGCAC    | TACATGAGCGCTCCGGCAC     |
| CD28   | TTTACCTATCAGCCCCAGTTTC  | AGTTCATTGCTCCTCTCGTT    |
| CD40L  | CGGCAAATACCCACAGTTCCT   | AGCACCAGCTTGTAAATCAAACA |
| CD44   | GAATGTAACCTCCGCTACG     | GGAGGTGTTGGACGTGAC      |
| CD69   | GGGCTGTGTTAATAGTGGTCCTC | CTTGCAGGTAGCAACATGGTGG  |
| CXCL11 | CATTTTGACGGCTTTCATC     | AAGGTCACAGCCATAGCCCT    |
| Smad2  | CCCACTCCATTCCAGAAAAC    | GAGCCTGTGTCCATACTTTG    |
| Flt3L  | GAGGACGTCAACACCGAGAT    | AGGTGGGAGATGTTGGTCTG    |
| VEGF   | TGCTCACTTCCAGAAACACG    | GGAAGGGTAAGCCACTCACA    |

---

181

182

183

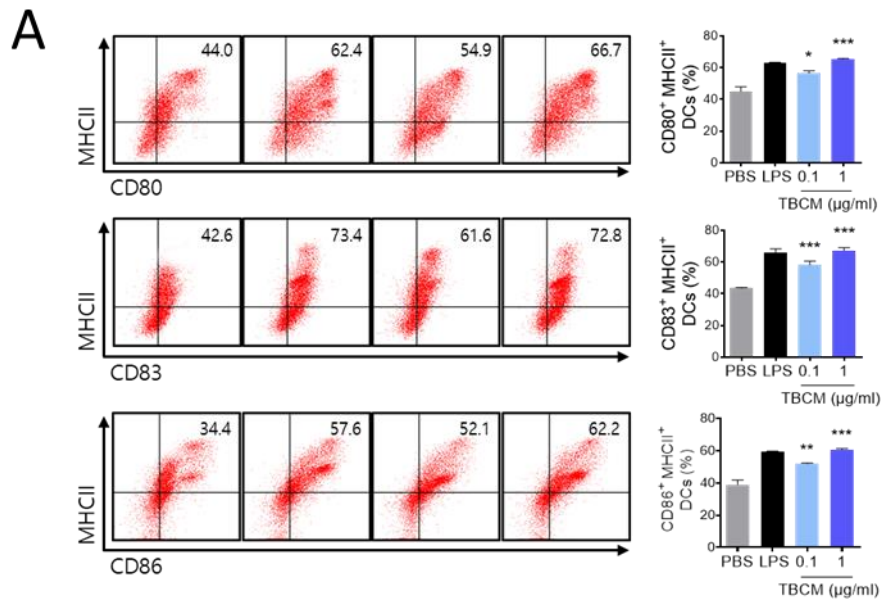

184

185 **Supplementary Figure S1. TBCM induces elevated co-expression of MHCII and CD80, CD83 or**  
 186 **CD86 in DCs.** BMDCs were incubated with TBCM (0.1 or 1 μg/ml) or LPS (0.1 μg/ml) for 24 h, and  
 187 then assessed for co-expression of surface maturation marker MHCII and CD80, CD83 or CD86 by  
 188 flow cytometry. (A) Population of MHCII<sup>+</sup> CD80<sup>+</sup>, MHCII<sup>+</sup> CD83<sup>+</sup>, and MHCII<sup>+</sup> CD86<sup>+</sup> DCs.  
 189 Significant differences (\**p* < 0.05, \*\**p* < 0.01, and \*\*\**p* < 0.001) among the different groups are  
 190 shown in the related figures, and the data are presented as the means ± s.e.m. of four independent  
 191 experiments.

192

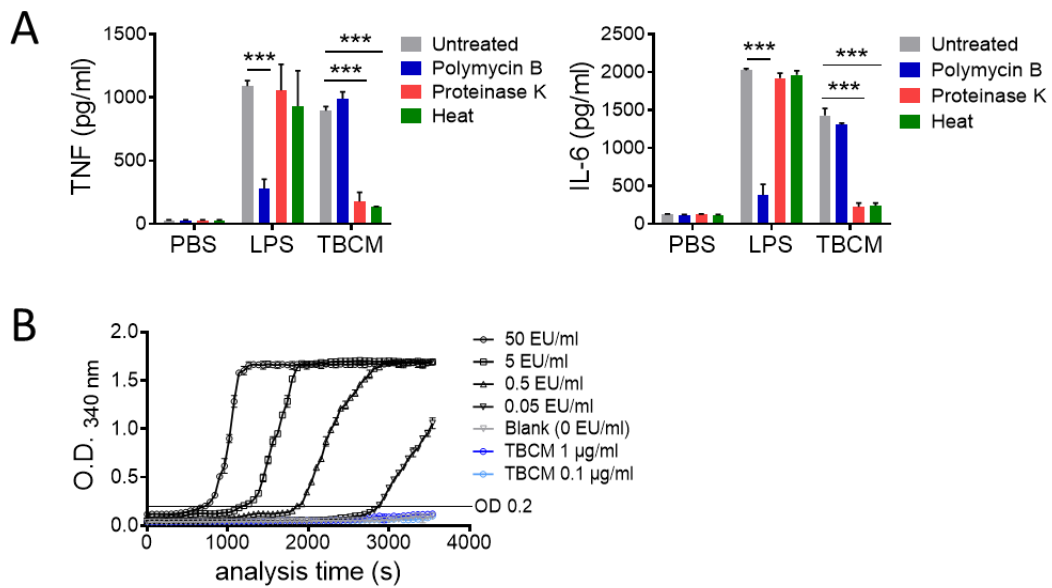

193

194 **Supplementary Figure S2. DC activation after treatment with polymycin B, proteinase K and**

195 **heat denaturation.** (A) For the endotoxin contamination test, TBCM and LPS were preincubated

196 with polymycin B (10 µg/ml), proteinase K (10 µg/ml) and heat denaturation (boiling at 100°C) and

197 then added to BMDC cultures. 24 h after incubation, cytokine levels in culture supernatants were

198 assessed by ELISA. (B) LPS contamination of purified TBCM was assessed by LAL assay (Lonza).

199 Significant differences ( $*p < 0.05$ ,  $**p < 0.01$ , and  $***p < 0.001$ ) among the different groups are

200 shown in the related figures, and the data are presented as the means  $\pm$  s.e.m. of three independent

201 experiments.

202

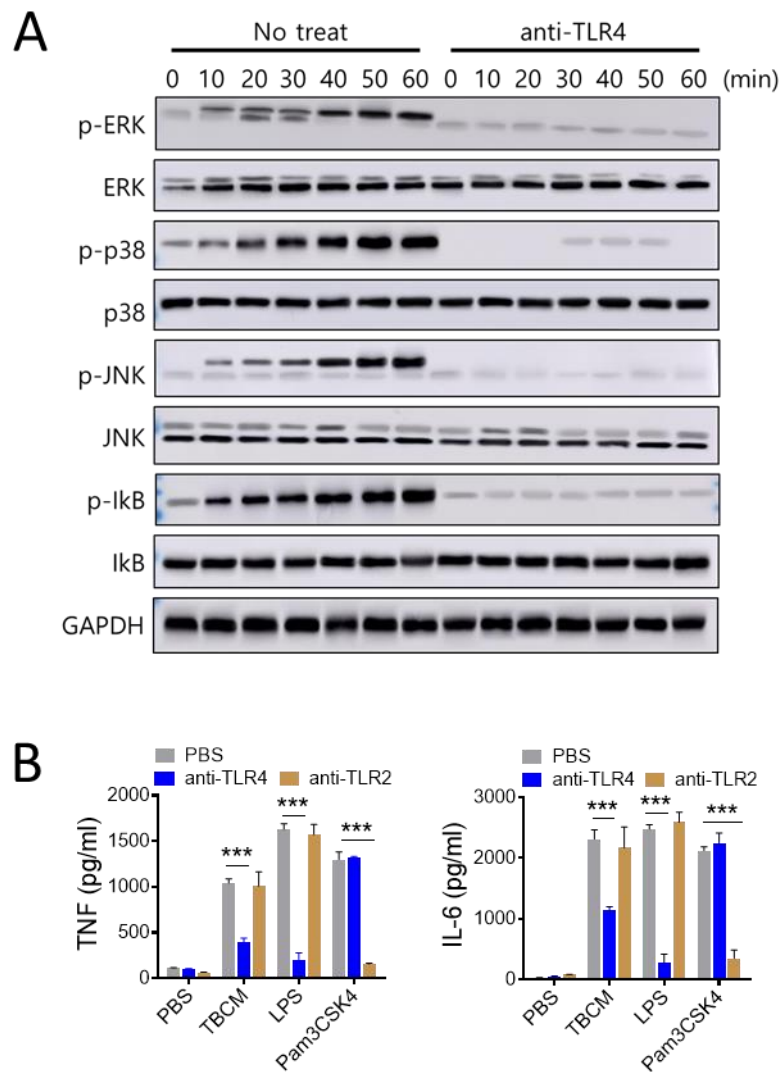

204 **Supplementary Figure S3. TBCM induces DC activation through interaction with TLR4.**

205 BMDCs were incubated with anti-TLR2 IgG or anti-TLR4 IgG prior to incubation with TBCM (1

206  $\mu\text{g/ml}$ ), LPS (0.1  $\mu\text{g/ml}$ ) or Pam<sub>3</sub>CSK<sub>4</sub> (0.1  $\mu\text{g/ml}$ ). (A) DCs were harvested at the indicated time

207 points, the DC lysates were then subjected to SDS-polyacrylamide gel electrophoresis, and an

208 immunoblot analysis was conducted. (B) Cytokines in culture supernatant were measured by ELISA.

209 Significant differences ( $*p < 0.05$ ,  $**p < 0.01$ , and  $***p < 0.001$ ) among the different groups are

210 shown in the related figures, and the data are presented as the means  $\pm$  s.e.m. of three independent

211 experiments.

212

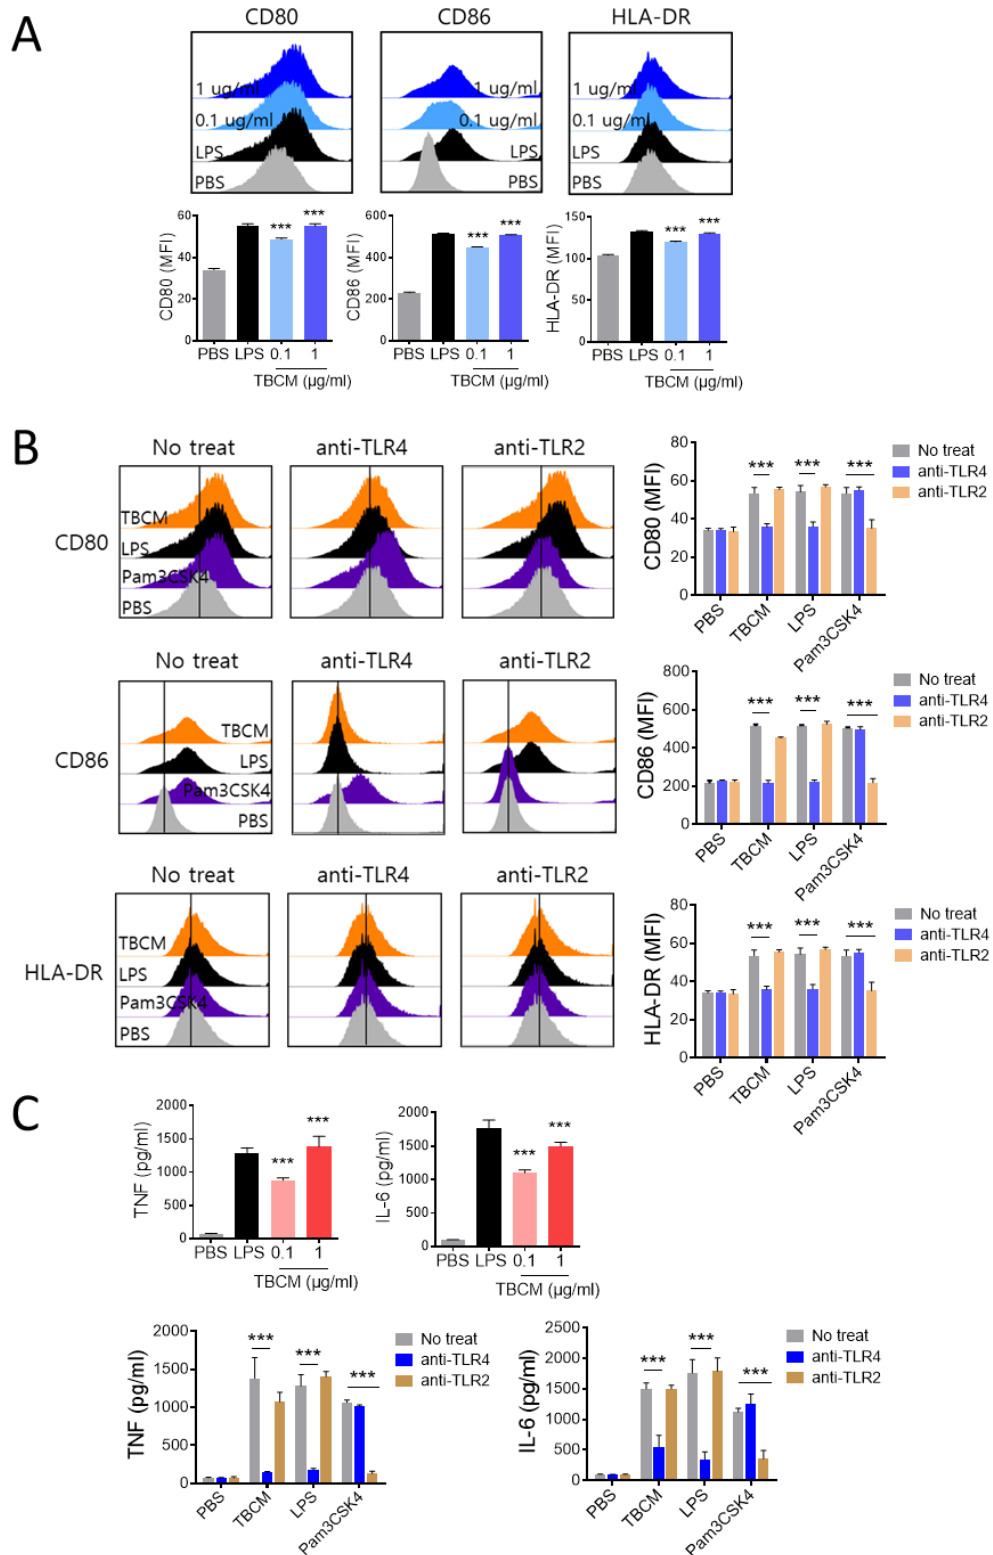

213

214 **Supplementary Figure S4. TBCM induces human monocytic THP-1 activation through**  
 215 **interaction with TLR4.** Human monocytic THP-1 cells were differentiated by treatment with PMA

216 (200 µg/ml) for 24 h and then incubated with anti-human TLR4 IgG and anti-human TLR2 IgA prior  
217 to incubation with TBCM (1 µg/ml) or LPS (0.1 µg/ml). (A,B) THP-1 cells were harvested 24 h after  
218 incubation, and the surface expression of CD80, CD86 and HLA-DR was determined by flow  
219 cytometry. (C) Cytokines in the culture supernatants were detected by ELISA. Significant differences  
220 ( $*p < 0.05$ ,  $**p < 0.01$ , and  $***p < 0.001$ ) among the different groups are shown in the related  
221 figures, and the data are presented as the means  $\pm$  s.e.m. of three independent experiments.

222

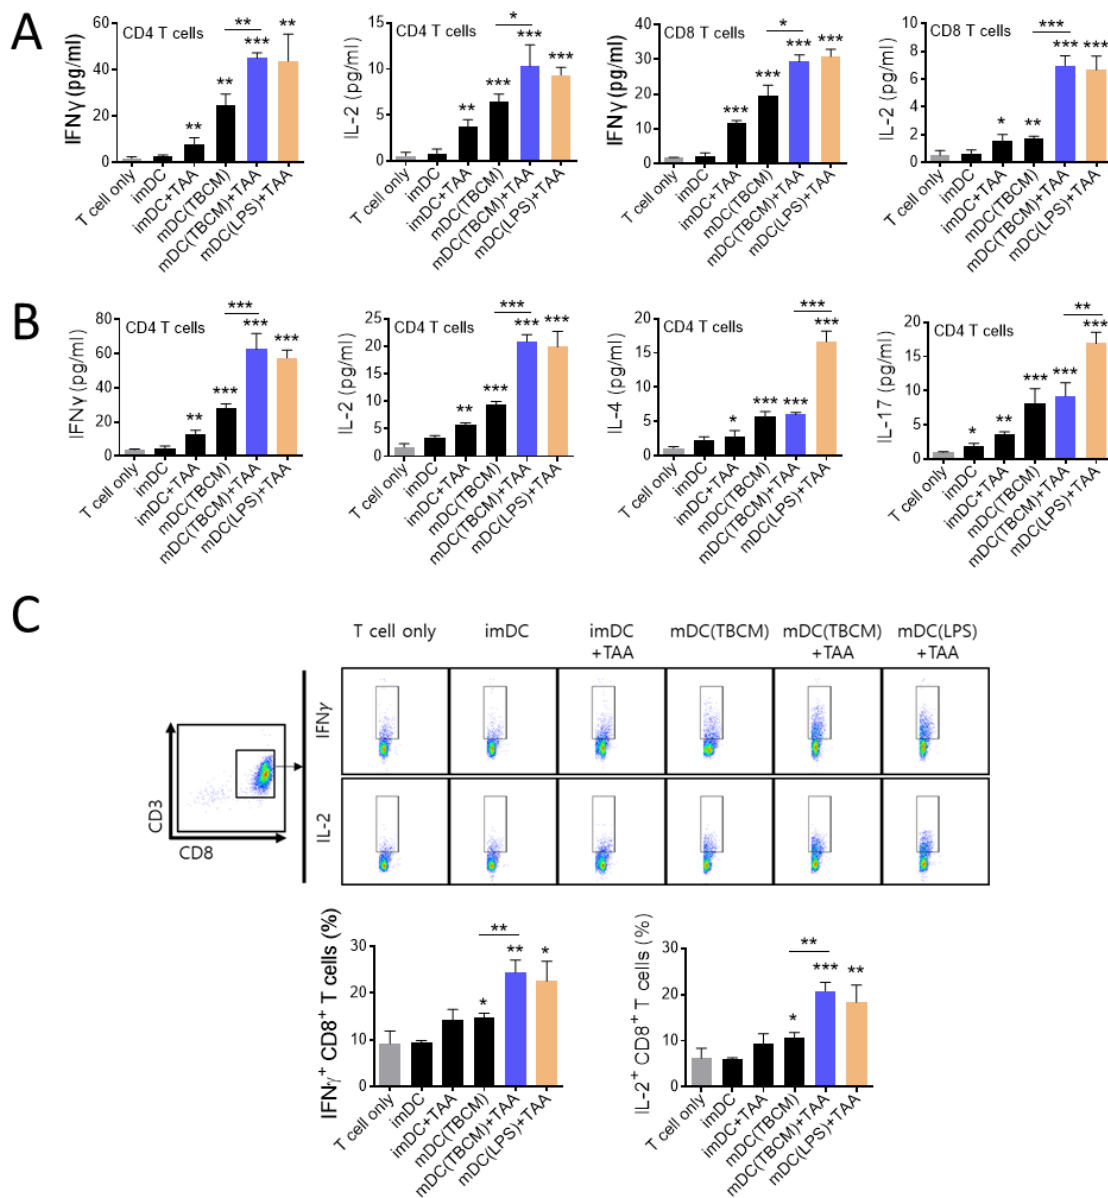

223

224 **Supplementary Figure S5. TBCM-induced DCs induce cytokine production in CD8<sup>+</sup> T cells.**

225 BMDCs were incubated with LLC lysates (tumor-associated antigens; TAAs) at a ratio of 3:1 tumor

226 cell equivalents in the presence or absence of TBCM (1  $\mu$ g/ml) or lipopolysaccharide (0.1  $\mu$ g/ml) for

227 24 h. CD4<sup>+</sup> and CD8<sup>+</sup> T cells isolated from mouse spleen were stained with CFSE and cocultured with

228 TAA-, TBCM- or LPS-treated DCs (T cell:DC=10:1). (A) 24 h after coculture, cytokine production in

229 the culture supernatant was measured by ELISA. (B) 72 h after coculture, cytokine production in

230 culture supernatant was measured by ELISA. (C) 72 h after coculture, intracellular cytokine



231 production in CD8<sup>+</sup> T cells was assessed by flow cytometry. Significant differences ( $*p < 0.05$ ,  $**p$   
232  $< 0.01$ , and  $***p < 0.001$ ) among the different groups are shown in the related figures, and the data  
233 are presented as the means  $\pm$  s.e.m. of four independent experiments.

234

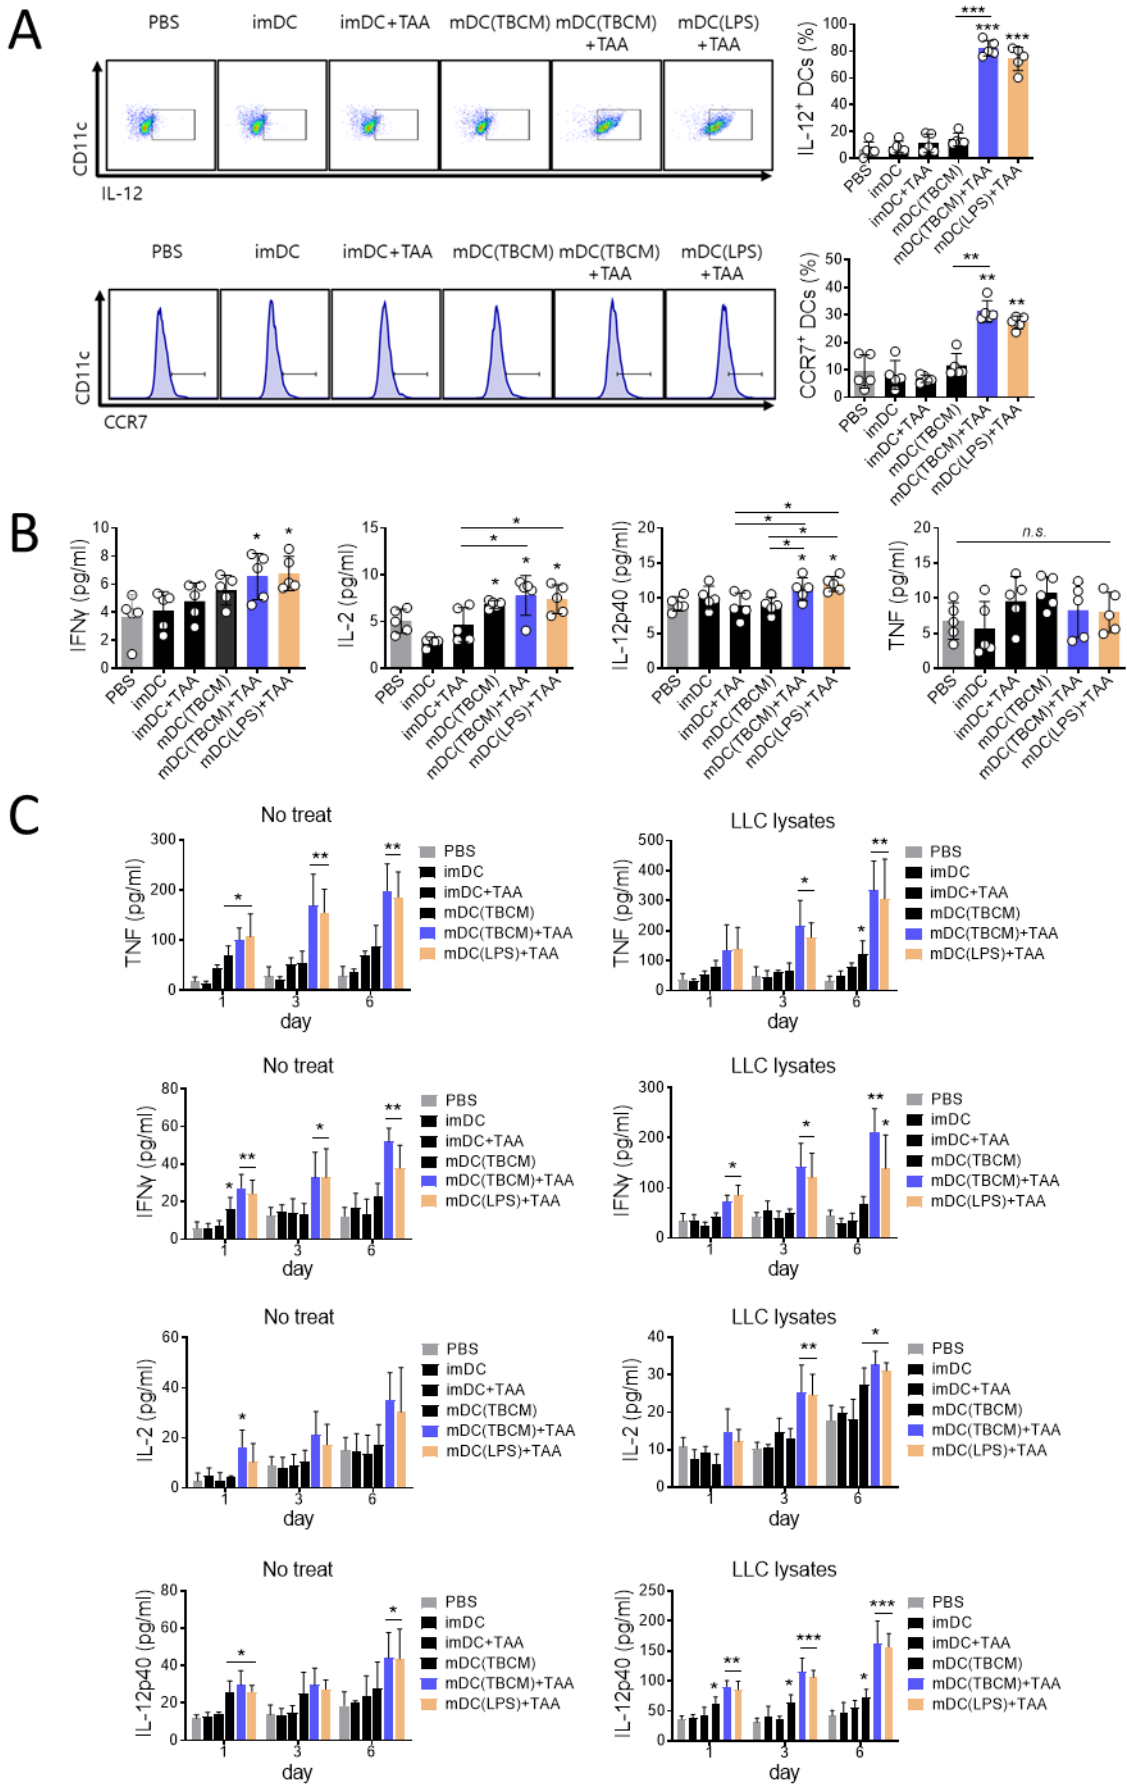

236 **Supplementary Figure S6. TBCM-induced DCs enhanced inflammatory cytokine production in**  
237 **response to LLC lysate stimulation.** C57BL/6 mice were subcutaneously injected with LLC cancer  
238 cells and vaccinated with DCs via footpad injection twice at intervals of one week. **(A)** On day 25  
239 after the cancer cell injection, tumor-infiltrating DCs were assessed by flow cytometry. **(B)** On day 25  
240 after the cancer cell injection, systemically produced cytokines in serum were measured by ELISA.  
241 **(C)** On Day 25 after cancer cell injection, splenocytes were incubated with LLC lysates for 6 days.  
242 Significant differences ( $*p < 0.05$ ,  $**p < 0.01$ , and  $***p < 0.001$ ) among the different groups are  
243 shown in the related figures, and the data are presented as the means  $\pm$  s.e.m. of five independent  
244 experiments.

245

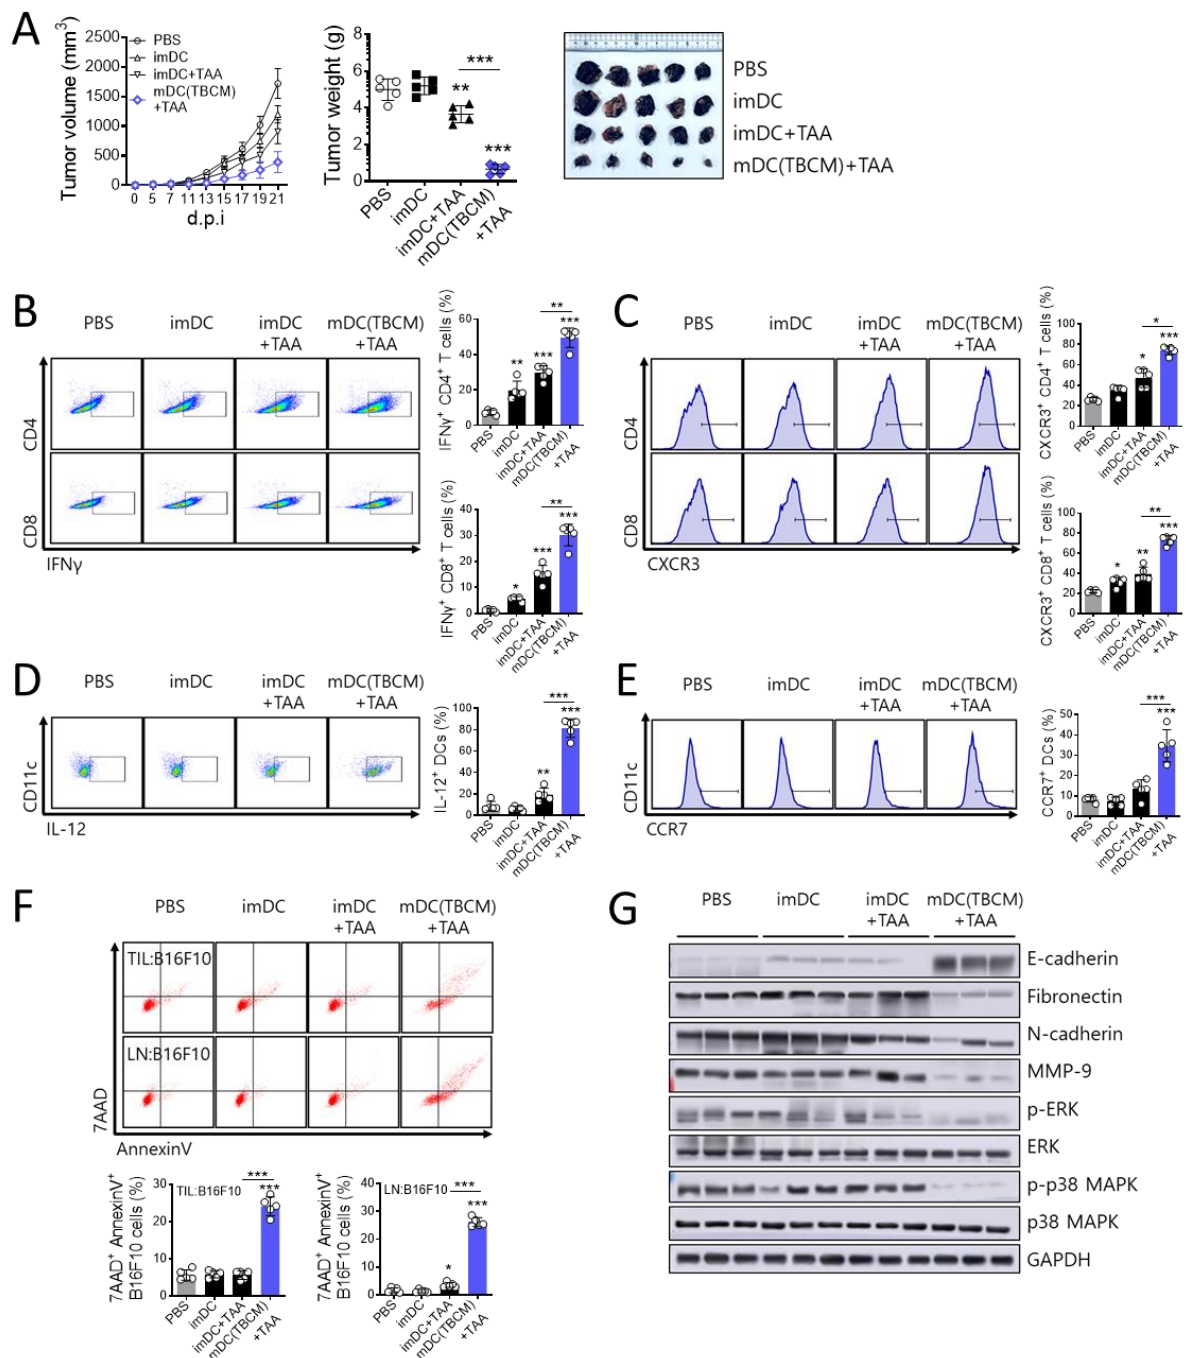

246

247 **Supplementary figure S7. TBCM-treated DCs exerts therapeutic effects in B16F10 cancer via**  
 248 **induction of antigen-specific immune response. (A)** C57BL/6 mice were subcutaneously injected  
 249 with B16F10 cancer cells and vaccinated with DCs via footpad injection twice at intervals of one  
 250 week. Representative pictures shows excised tumor on day 24 after cancer cell injection. Growth

251 curve shows tumor volume as the mean  $\pm$ SD at the indicated time points, and tumor weight measured  
252 on day 25 after the cancer cell injection. **(B-E)** On day 24 after the cancer cell injection, tumor-  
253 infiltrating lymphocytes (TILs) and dendritic cells were assessed by flow cytometry. **(F)** Lymph  
254 nodes cells and TILs were isolated and cocultured with CFSE-labelled B16F10 cells for 24 h, and  
255 cytotoxicity of the immune cells were assessed by cell apoptosis assay. **(G)** Protein expression of  
256 ERK, epithelial-mesenchymal transition (EMT)-related proteins, and matrix metalloproteinases in  
257 primary tumor cells was assessed by immunoblotting assay. Significant differences ( $*p < 0.05$ ,  $**p <$   
258  $0.01$ ,  $***p < 0.001$ ) among the different groups are shown in the related figures, and the data are  
259 presented as the means  $\pm$  s.e.m. of five independent experiments.

260

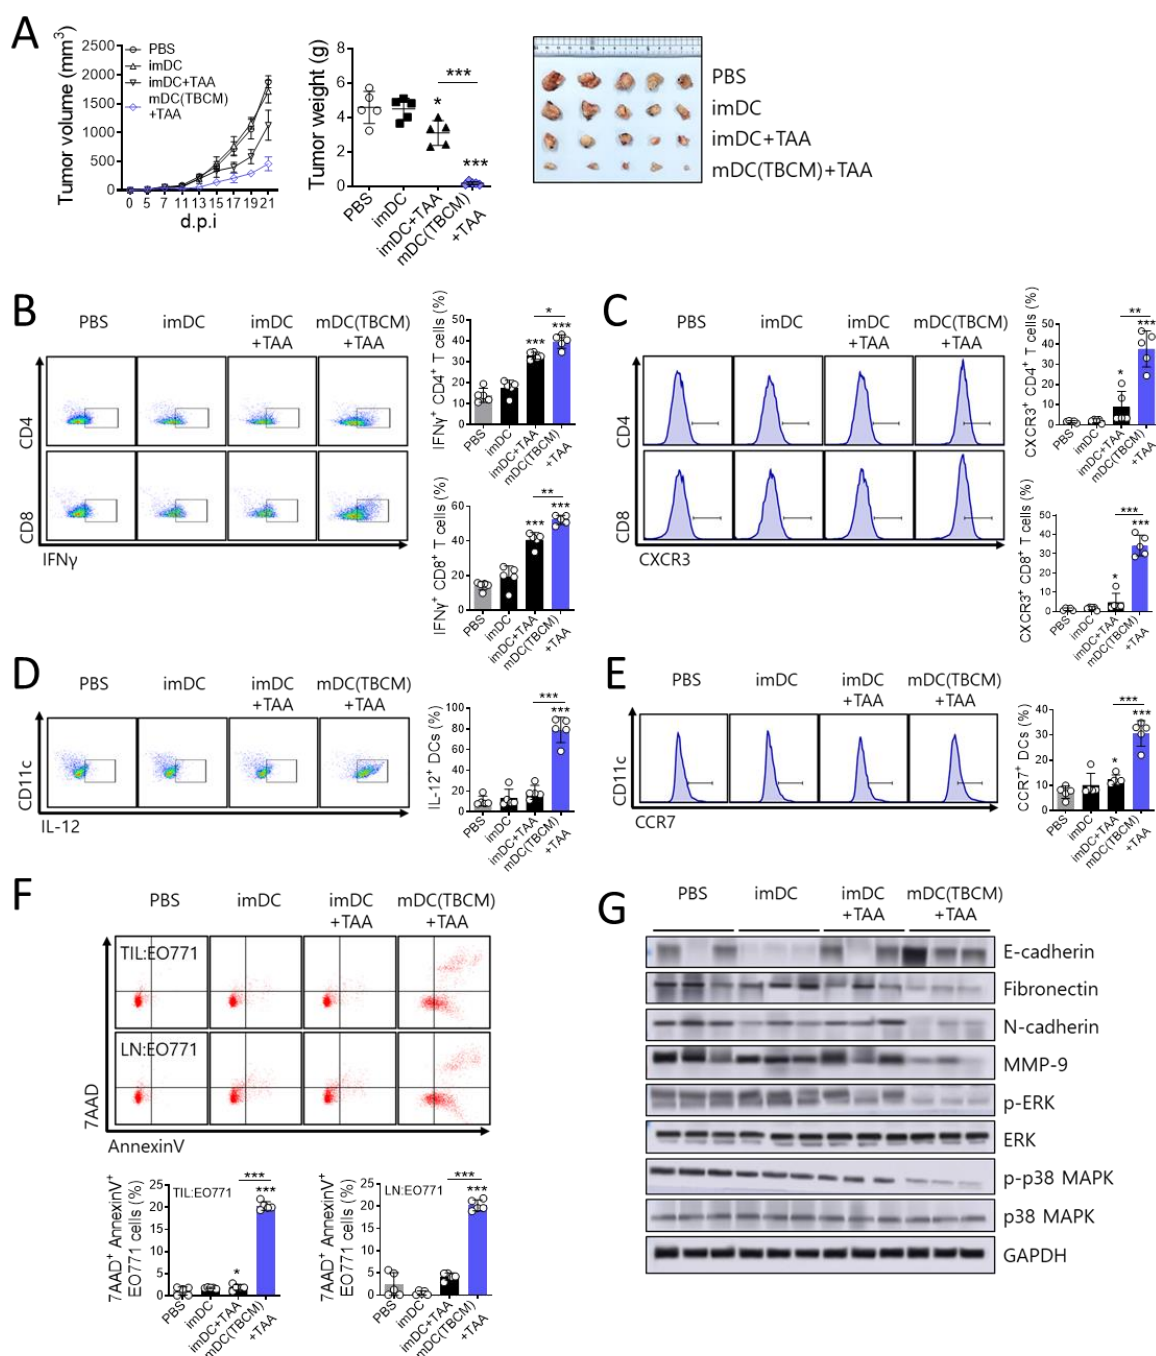

261

262 **Supplementary figure S8. TBCM-treated DCs exerts therapeutic effects in EO771 cancer via**

263 **induction of antigen-specific immune response. (A) C57BL/6 mice were subcutaneously injected**

264 **with EO771 cancer cells and vaccinated with DCs via footpad injection twice at intervals of one week.**

265 **Growth curve shows tumor volume as the mean  $\pm$  SD at the indicated time points, and tumor weight**

266 **measured on day 25 after the cancer cell injection. Representative pictures shows excised tumor on**

267 day 24 after cancer cell injection. **(B-E)** On day 24 after the cancer cell injection, tumor-infiltrating  
268 lymphocytes (TILs) and dendritic cells were assessed by flow cytometry. **(F)** Lymph nodes cells and  
269 TILs were isolated and cocultured with CFSE-labelled EO771 cells for 24 h, and cytotoxicity of the  
270 immune cells were assessed by cell apoptosis assay. **(G)** Protein expression of ERK and EMT-related  
271 proteins in primary tumor cells was assessed by immunoblotting assay. Significant differences ( $*p <$   
272  $0.05$ ,  $**p < 0.01$ ,  $***p < 0.001$ ) among the different groups are shown in the related figures, and the  
273 data are presented as the means  $\pm$  s.e.m. of five independent experiments.

274

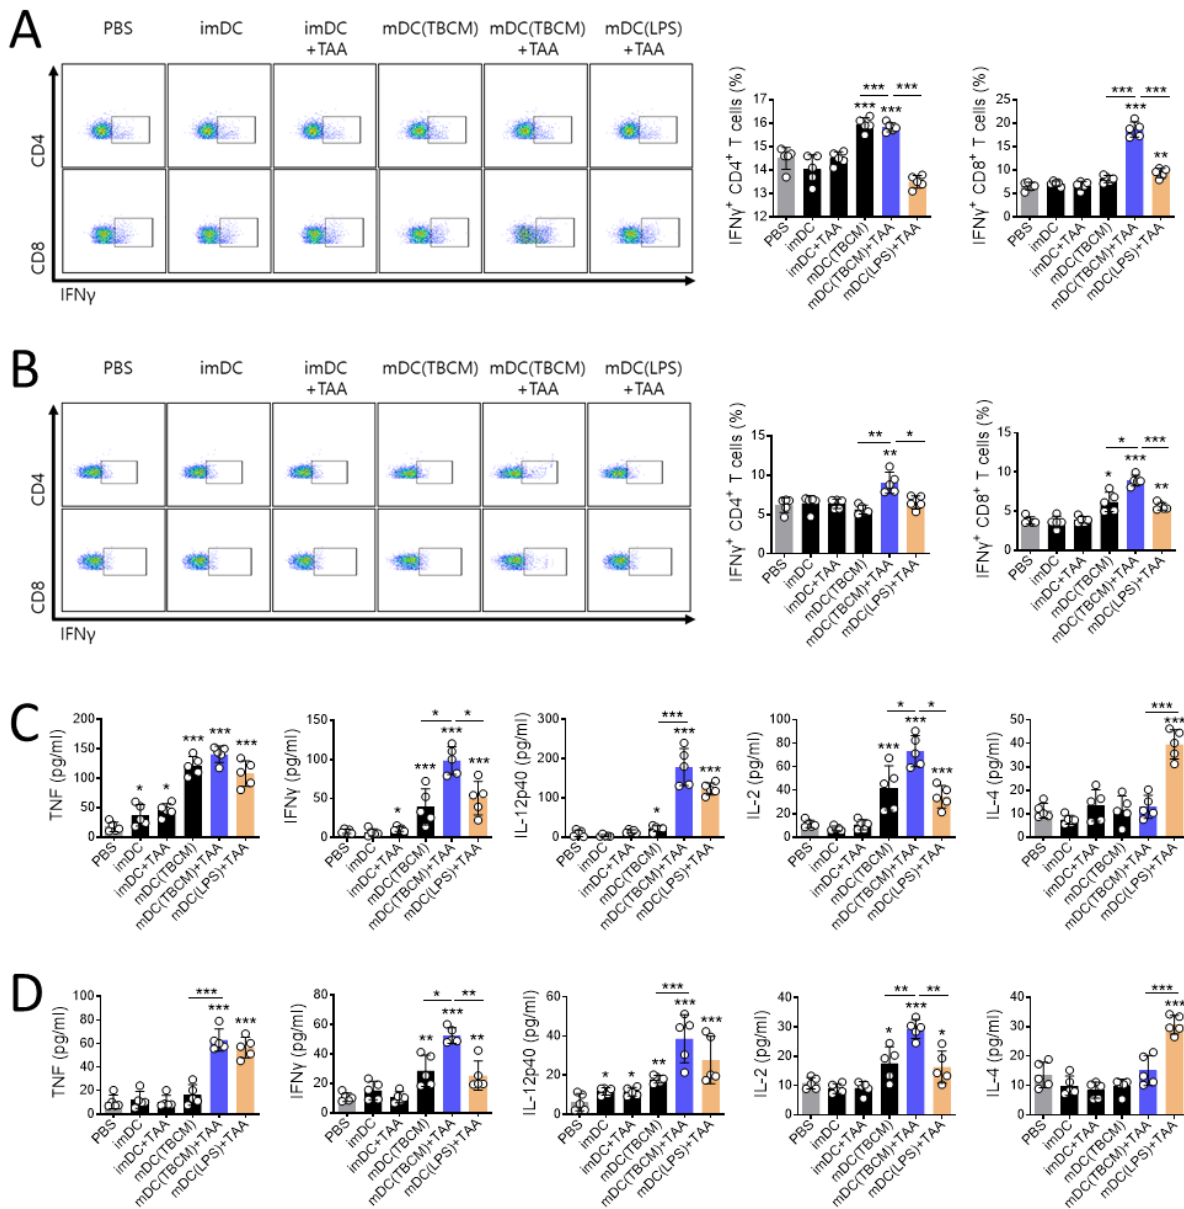

275

276 **Supplementary figure S9. TBCM-induced DCs exerts sustained tumor prevention via T cell**

277 **activation.** C57BL/6 mice were vaccinated with BMDCs twice at intervals of one week. Seven weeks

278 after the last DC injection, LLC cancer cells were injected intravenously. (A,B) Seven days after the

279 cancer cell injection, cytokine-releasing T cells in lymph nodes and lung were assessed by flow

280 cytometry, respectively. (C,D) Seven days after the cancer cell injection, lymph nodes and lung

281 lymphocytes were cocultured with LLC cancer cells for 24 h, and then cytokines in culture

282 supernatants were measured by ELISA. Significant differences (\* $p < 0.05$ , \*\* $p < 0.01$ , \*\*\* $p <$



283 0.001) among the different groups are shown in the related figures, and the data are presented as the  
284 means  $\pm$  s.e.m. of five independent experiments.

285

286
